# Supplementary material
Source: PubMed Central journal article supplement (PMC7066999)
Supplement: NIHMS1548616-supplement-1.pdf [file NIHMS1548616-supplement-1.pdf]

**Supplementary information: Convergence and machine learning predictions of Monkhorst-Pack k-points and plane-wave cut-off in high-throughput DFT calculations**

Kamal Choudhary, Francesca Tavazza

Materials Science and Engineering Division, National Institute of Standards and Technology, Gaithersburg, Maryland  
20899, USA

Table S1: PAW potentials used during the generation of DFT database.

| Element | VASP PAW-potential used |
|---------|-------------------------|
| Ac      | Ac                      |
| Ag      | Ag                      |
| Al      | Al                      |
| Ar      | Ar                      |
| As      | As                      |
| Au      | Au                      |
| B       | B                       |
| Ba      | Ba_sv                   |
| Be      | Be_sv                   |
| Bi      | Bi                      |
| Br      | Br                      |
| C       | C                       |
| Ca      | Ca_sv                   |
| Cd      | Cd                      |
| Ce      | Ce                      |
| Cl      | Cl                      |
| Co      | Co                      |
| Cr      | Cr_pv                   |
| Cs      | Cs_sv                   |

|    |       |
|----|-------|
| Cu | Cu_pv |
| Dy | Dy_3  |
| Er | Er_3  |
| Eu | Eu    |
| F  | F     |
| Fe | Fe_pv |
| Ga | Ga_d  |
| Gd | Gd    |
| Ge | Ge_d  |
| H  | H     |
| He | He    |
| Hf | Hf_pv |
| Hg | Hg    |
| Ho | Ho_3  |
| I  | I     |
| In | In_d  |
| Ir | Ir    |
| K  | K_sv  |
| Kr | Kr    |
| La | La    |
| Li | Li_sv |
| Lu | Lu_3  |
| Mg | Mg_pv |

|    |       |
|----|-------|
| Mn | Mn_pv |
| Mo | Mo_pv |
| N  | N     |
| Na | Na_pv |
| Nb | Nb_pv |
| Nd | Nd_3  |
| Ne | Ne    |
| Ni | Ni_pv |
| Np | Np    |
| O  | O     |
| Os | Os_pv |
| P  | P     |
| Pa | Pa    |
| Pb | Pb_d  |
| Pd | Pd    |
| Pm | Pm_3  |
| Pr | Pr_3  |
| Pt | Pt    |
| Pu | Pu    |
| Rb | Rb_sv |
| Re | Re_pv |
| Rh | Rh_pv |
| Ru | Ru_pv |

|    |       |
|----|-------|
| S  | S     |
| Sb | Sb    |
| Sc | Sc_sv |
| Se | Se    |
| Si | Si    |
| Sm | Sm_3  |
| Sn | Sn_d  |
| Sr | Sr_sv |
| Ta | Ta_pv |
| Tb | Tb_3  |
| Tc | Tc_pv |
| Te | Te    |
| Th | Th    |
| Ti | Ti_pv |
| Tl | Tl_d  |
| Tm | Tm_3  |
| U  | U     |
| V  | V_pv  |
| W  | W_pv  |
| Xe | Xe    |
| Y  | Y_sv  |
| Yb | Yb_2  |
| Zn | Zn    |

|    |       |
|----|-------|
| Zr | Zr_sv |
|    |       |

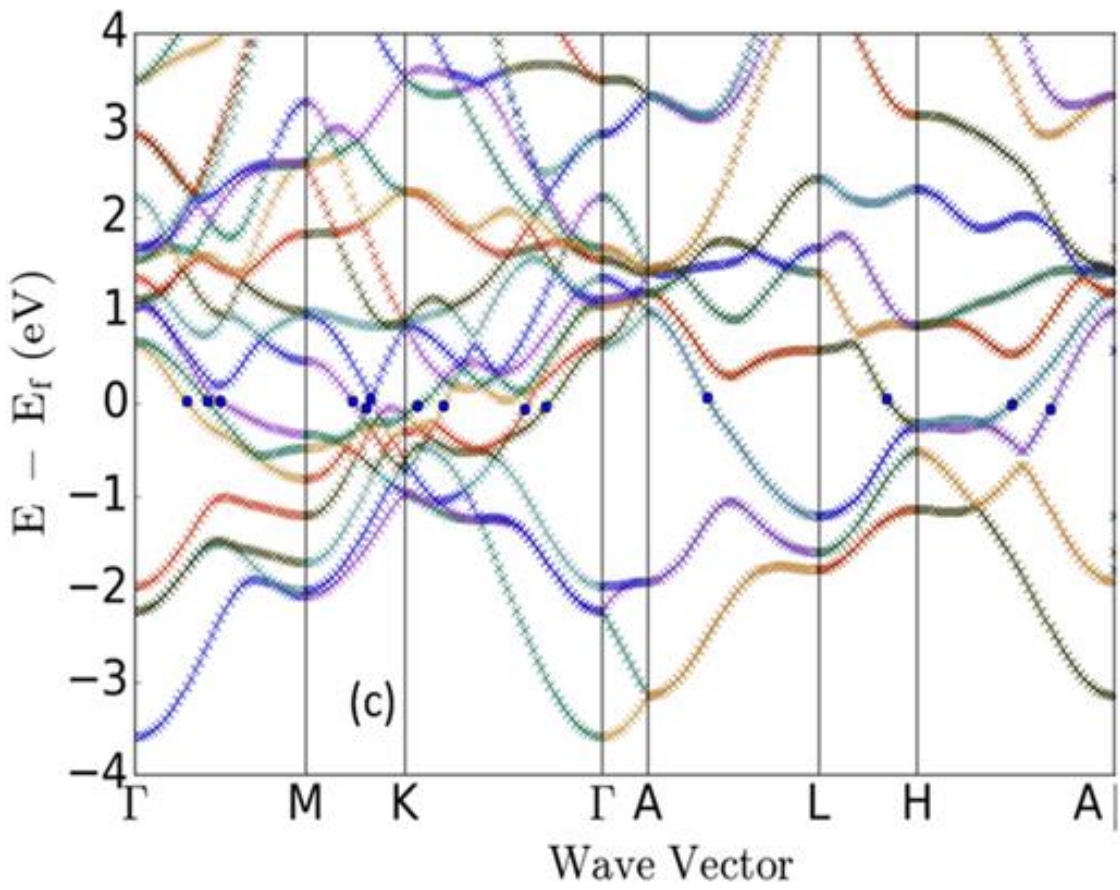

Fig. S1 An example is shown for band-crossings in Pr (JVASP-14689). The dots represent the bands crossing the Fermi-level.

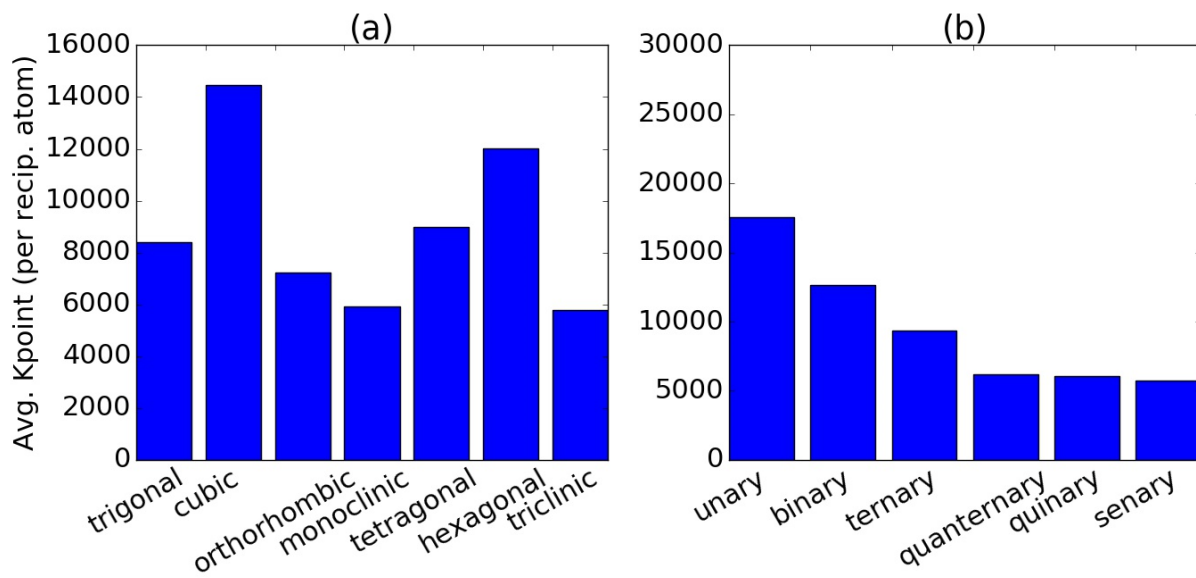

Fig. S2 Correlation of density based average k-points for the seven crystal systems and number of atoms in the cell.
